# Supplementary material for: The Pratylenchus penetrans Transcriptome as a Source for the Development of Alternative Control Strategies: Mining for Putative Genes Involved in Parasitism and Evaluation of in planta RNAi
Source: PubMed Central journal article supplement (PMC4684371; doi:10.1371/journal.pone.0144674), 2015-12-14
Supplement: pone.0144674.s003.pdf [file pone.0144674.s003.pdf]

**S1 Table. List of primers.**

| <b>Primers used for the pRAP17 constructs</b>             |                            |
|-----------------------------------------------------------|----------------------------|
| <b>PCR amplification</b>                                  |                            |
| Pp-pat-10 - F                                             | CACCGTTTGACCGAGGCAAGAATG   |
| Pp-pat-10 - R                                             | GTCACCGGCCATCAGTT          |
| Pp-unc-87 - F                                             | CACCGTGACTCCCAGAAGTTGATGAC |
| Pp-unc-87 - R                                             | TTGTTTGACCCGACTGGAG        |
| NPT-II - F                                                | TCGGCTATGACTGGGCACAACAGA   |
| NPT-II - R                                                | AAGAAGCGATAGAAGGCGATGCG    |
| FMV - F                                                   | AAGAAGCCCTCCAGCTTCAAAG     |
| Intron 2 - R                                              | CCAGTTAACGTGTCTCATAT       |
| eGFP - F                                                  | ATGGTGAGCAAGGGCGAGGAGC     |
| eGFP - R                                                  | TCGTCCATGCCGAGAGTGATCCCG   |
| Ri K599 - F                                               | TCAGCCTCCCGCCGGATG         |
| Ri K599 - R                                               | ATGCAAAAGACAGGATTGATCGCA   |
| <b>RT-PCR reaction</b>                                    |                            |
| Pp-pat-10 - F                                             | GAATTCTGCGCACTGGTCTA       |
| Pp-pat-10 - R                                             | TGCCTCTTCAGCTCCTTTC        |
| Pp-unc-87 - F                                             | CCCGTAACACAACAACAAGG       |
| Pp-unc-87 - R                                             | TCGATTTGTACCGACTGAAG       |
| Intron 2 - F                                              | CTGACCTGCAAAACAGTTAAAT     |
| Intron 2 - R                                              | TTCATTGAATTTGATGGCCATAGG   |
| <b>Primers used for nematode candidate genes (RT-PCR)</b> |                            |
| Pp-ENG1-F                                                 | GCAACAATCCGCACATCATC       |
| Pp-ENG1-R                                                 | CTGGTGAACCGGAACAACACT      |
| Pp-ENG2-F                                                 | GGATTTGCGCAACAAGCG         |
| Pp-ENG2-R                                                 | ATCATCATCATCAGCCATCCAA     |
| Pp-PEL1-F                                                 | GAGAAGTTCAGCCGAGTGTATC     |
| Pp_PEL1-R                                                 | GACTTGATGCTAATTGCCGATT     |
| Pp-GXP1-F                                                 | GGTCCACCGAAACAGGAAA        |
| Pp-GXP1-R                                                 | TGGTGCAGTGAGCCATTT         |
| Pp-GST - F                                                | CGGAAAGGACGAATGGGAAA       |
| Pp-GST - R                                                | CTTCCGGGCGAGCCAATA         |
| Pp-FAR1-F                                                 | TGGCCTTTATAGCCATAGCAC      |
| Pp-FAR1-R                                                 | GCCTTCGGGTTTCAGCA          |
| Pp-VAP1-F                                                 | CGGGCCGAAACCTAATACAA       |
| Pp-VAP1-R                                                 | GGCACAATGCAAAGCGAAT        |
| Pp-Pioneer* - F                                           | TTTCTTCCACTCTGCGATG        |
| Pp-Pioneer* - R                                           | CCCAAACATATTTATCCTTCTTCTC  |
| Pp-Catalase - F                                           | CCAACATGGTCTGGGACTTT       |
| Pp-Catalase - R                                           | GACCCGAATCCGTCCATTT        |
| Pp-peptidase C1A - F                                      | TGACCGGAACCAACACATT        |
| Pp-peptidase C1A - R                                      | GACCTCCTGAACCGACAATAG      |
| Pp-Pioneer** - F                                          | TACGGTTATAATCCGCCTCCT      |
| Pp-Pioneer** - R                                          | CCCATTCCACCACCAATGA        |
| Pp-18S-F                                                  | ATGAGAGGGCAAGTCTGGTG       |
| Pp-18S-R                                                  | GAAAGCCGAAGACATCCAGT       |
| Gmax-Ubi3-F                                               | GTGTAATGTTGGATGTGTTCCC     |
| Gmax-Ubi3-R                                               | ACACAATTGAGTTCAACACAACCCG  |
