# Supplementary material for: The Pratylenchus penetrans Transcriptome as a Source for the Development of Alternative Control Strategies: Mining for Putative Genes Involved in Parasitism and Evaluation of in planta RNAi
Source: PubMed Central journal article supplement (PMC4684371; doi:10.1371/journal.pone.0144674), 2015-12-14
Supplement: pone.0144674.s004.pdf [file pone.0144674.s004.pdf]

**S2 Table. Transcripts of *Pratylenchus penetrans* encoding predicted neuropeptides.** Blastx searches (E-value < 1e<sup>-5</sup>) were performed against the different neuropeptide homologues described for *Caenorhabditis elegans*.

**Predicted transcripts encoding FMRFamide-like peptides\***

| FLPs          | <i>C. elegans</i> | <i>Pratylenchus penetrans</i> |             |               |
|---------------|-------------------|-------------------------------|-------------|---------------|
|               |                   | # of transcripts              | E-value     | High bitscore |
| <i>flp-1</i>  | F23B2.5           | 1                             | 6.47776E-11 | 60.08         |
| <i>flp-3</i>  | W07E11.2          | 1                             | 4.55678E-13 | 65.08         |
| <i>flp-5</i>  | C03G5.7           | 1                             | 3.03286E-08 | 50.83         |
| <i>flp-6</i>  | F07D3.2           | 1                             | 1.82175E-14 | 70.86         |
| <i>flp-7</i>  | F49E10.3          | 1                             | 1.98305E-21 | 90.12         |
| <i>flp-11</i> | K02G10.4          | 6                             | 5.71409E-13 | 63.93         |
| <i>flp-13</i> | F33D4.3           | 2                             | 0.00000345  | 43.90         |
| <i>flp-14</i> | Y37D8A.15         | 1                             | 1.86259E-22 | 91.28         |
| <i>flp-16</i> | F15D4.8           | 1                             | 2.37294E-13 | 65.86         |
| <i>flp-18</i> | Y48D7A.2          | 1                             | 3.86438E-14 | 70.09         |
| <i>flp-22</i> | F39H2.1           | 1                             | 2.59659E-14 | 67.01         |
| <i>flp-34</i> | R09A1.5           | 1                             | 1.14472E-10 | 58.54         |

\*Search for homologues of *flp-30* and *flp-31*, which are considered specific to plant-parasitic nematodes (sedentary species) was also performed, however, no matches were found.

**Predicted transcripts encoding non-Insulin, non-FLP like peptides**

| FLPs          | <i>C. elegans</i> | <i>Pratylenchus penetrans</i> |             |               |
|---------------|-------------------|-------------------------------|-------------|---------------|
|               |                   | # of transcripts              | E-value     | High bitscore |
| <i>nlp-1</i>  | C01C4.1           | 2                             | 6.42728E-06 | 45.82         |
| <i>nlp-2</i>  | T24D8.5           | 1                             | 7.29035E-16 | 74.71         |
| <i>nlp-10</i> | F37A8.4           | 1                             | 1.57597E-10 | 56.23         |
| <i>nlp-12</i> | M01D7.5           | 1                             | 1.06162E-14 | 68.55         |
| <i>nlp-13</i> | E03D2.1           | 2                             | 5.90155E-21 | 87.81         |
| <i>nlp-15</i> | CC4.2             | 5                             | 4.24961E-25 | 99.75         |
| <i>nlp-37</i> | F48B9.4           | 1                             | 1.36237E-07 | 48.52         |
| <i>nlp-38</i> | C01A2.7           | 1                             | 1.99889E-06 | 45.82         |
| <i>nlp-40</i> | Y74C9A.2          | 1                             | 1.38484E-09 | 57.38         |

**Predicted transcript encoding insulin-like peptides**

| FLPs          | <i>C. elegans</i> | <i>Pratylenchus penetrans</i> |             |               |
|---------------|-------------------|-------------------------------|-------------|---------------|
|               |                   | # of transcripts              | E-value     | High bitscore |
| <i>ins-1</i>  | F13B12.5          | 2                             | 3.08858E-11 | 59.3066       |
| <i>ins-17</i> | F56F3.6           | 1                             | 1.13334E-07 | 49.2914       |
| <i>ins-18</i> | T28B8.2           | 1                             | 1.23396E-11 | 58.9214       |
