# Supplementary material for: The Pratylenchus penetrans Transcriptome as a Source for the Development of Alternative Control Strategies: Mining for Putative Genes Involved in Parasitism and Evaluation of in planta RNAi
Source: PubMed Central journal article supplement (PMC4684371; doi:10.1371/journal.pone.0144674), 2015-12-14
Supplement: pone.0144674.s005.pdf [file pone.0144674.s005.pdf]

**S3 Table. *Pratylenchus penetrans* transcripts encoding for genes involved in the RNAi pathway, based upon the genes identified for *Caenorhabditis elegans* [36]. The presence (+) / absence (-) of the corresponding orthologues genes found in the genome of *Pratylenchus coffeae* [13] is also presented.**

| Predicted transcripts belonging to <i>P. penetrans</i> RNAi pathway |                               |                   | <i>P. penetrans</i> |              |               |      |
|---------------------------------------------------------------------|-------------------------------|-------------------|---------------------|--------------|---------------|------|
|                                                                     | <i>C. elegans</i>             | <i>P. coffeae</i> | # Transcripts       | Best E-value | High bitscore |      |
| <b>Small RNA biosynthetic proteins</b>                              | drh-3                         | +                 | 3                   | 1.48E-85     | 303.5         |      |
|                                                                     | drsh-1                        | +                 | 2                   | 2.38E-23     | 94.4          |      |
|                                                                     | xpo-1                         | +                 | 2                   | 0            | 1018.1        |      |
|                                                                     | xpo-2                         | +                 | 3                   | 4.03E-69     | 245.4         |      |
|                                                                     | dcr-1                         | +                 | 4                   | 4.84E-64     | 215.3         |      |
|                                                                     | drh-1                         | +                 | 4                   | 1.38E-29     | 123.6         |      |
|                                                                     | drh-2                         | -                 | -                   | -            | -             |      |
|                                                                     | pash-1                        | -                 | -                   | 2            | 8.32E-11      | 61.6 |
|                                                                     | rde-4                         | -                 | -                   | -            | -             |      |
|                                                                     | xpo-3                         | -                 | -                   | -            | -             |      |
|                                                                     | smg-2                         | +                 | 7                   | 8.00E-149    | 456.4         |      |
|                                                                     | <b>Amplification proteins</b> | smg-6             | +                   | 3            | 2.59E-21      | 98.2 |
| ego-1                                                               |                               | +                 | 8                   | 4.89E-110    | 364.0         |      |
| rrf-2                                                               |                               | +                 | 1                   | 3.68E-13     | 64.7          |      |
| rrf-3                                                               |                               | +                 | -                   | -            | -             |      |
| rrf-1                                                               |                               | +                 | -                   | -            | -             |      |
| smg-5                                                               |                               | -                 | -                   | -            | -             |      |
| <b>Spreading proteins</b>                                           | rsd-2                         | -                 | -                   | -            | -             |      |
|                                                                     | rsd-3                         | +                 | -                   | -            | -             |      |
|                                                                     | sid-1                         | -                 | -                   | -            | -             |      |
|                                                                     | rsd-6                         | -                 | -                   | -            | -             |      |
|                                                                     | sid-2                         | -                 | -                   | -            | -             |      |
| <b>Argonautes</b>                                                   | alg-1                         | +                 | 3                   | 5.25E-76     | 259.2         |      |
|                                                                     | C04F12.1                      | +                 | 2                   | 1.43E-53     | 203.0         |      |
|                                                                     | alg-4                         | +                 | -                   | -            | -             |      |
|                                                                     | rde-1                         | +                 | -                   | -            | -             |      |
|                                                                     | hrde-1                        | +                 | -                   | -            | -             |      |
|                                                                     | ppw-1                         | +                 | -                   | -            | -             |      |
|                                                                     | csr-1                         | +                 | -                   | -            | -             |      |
|                                                                     | ppw-2                         | +                 | 1                   | 2.26728E-06  | 45.1          |      |
|                                                                     | sago-1                        | -                 | -                   | -            | -             |      |
|                                                                     | alg-2                         | +                 | 4                   | 3.13E-72     | 259.2         |      |
|                                                                     | ergo-1                        | +                 | -                   | -            | -             |      |
|                                                                     | prg-1                         | +                 | -                   | -            | -             |      |
|                                                                     | hpo-24                        | +                 | -                   | -            | -             |      |
|                                                                     | nrde-3                        | +                 | 1                   | 8.16E-13     | 65.9          |      |
|                                                                     | sago-2                        | +                 | -                   | -            | -             |      |
|                                                                     | T23B3.2                       | +                 | -                   | -            | -             |      |
|                                                                     | M03D4.7                       | -                 | -                   | -            | -             |      |
|                                                                     | ZK218.8                       | -                 | -                   | -            | -             |      |
|                                                                     | prg-2                         | +                 | -                   | -            | -             |      |
|                                                                     | C06A1.4                       | -                 | -                   | -            | -             |      |
|                                                                     | C14B1.7                       | -                 | -                   | -            | -             |      |
|                                                                     | WAGO-1                        | +                 | 6                   | 2.02E-102    | 350.1         |      |
|                                                                     | WAGO-2                        | +                 | 2                   | 2.24E-58     | 211.1         |      |
|                                                                     | WAGO-10                       | -                 | 2                   | 3.10E-28     | 118.2         |      |
|                                                                     | WAGO-4                        | +                 | 1                   | 1.29E-39     | 158.3         |      |
|                                                                     | WAGO-11                       | +                 | 7                   | 7.52E-46     | 175.6         |      |
|                                                                     | WAGO-5                        | +                 | 6                   | 1.40E-45     | 178.3         |      |
| <b>RISC proteins</b>                                                | tsn-1                         | -                 | 2                   | 0            | 915.6         |      |
|                                                                     | ain-1                         | -                 | 1                   | 3.101E-07    | 53.9          |      |
|                                                                     | vig-1                         | -                 | -                   | -            | -             |      |
| <b>RNAi inhibitors</b>                                              | ain-2                         | -                 | -                   | -            | -             |      |
|                                                                     | eri-1                         | -                 | 1                   | 1.19E-57     | 198.7         |      |
|                                                                     | xrn-2                         | -                 | 6                   | 7.54E-85     | 280.8         |      |
|                                                                     | adr-2                         | -                 | -                   | -            | -             |      |
|                                                                     | xrn-1                         | -                 | -                   | -            | -             |      |
|                                                                     | adr-1                         | -                 | -                   | -            | -             |      |
|                                                                     | lin-15b                       | -                 | -                   | -            | -             |      |
|                                                                     | eri-5                         | -                 | -                   | -            | -             |      |
|                                                                     | eri-6/7                       | +                 | -                   | -            | -             |      |
|                                                                     | eri-3                         | -                 | -                   | -            | -             |      |
| <b>Nuclear RNAi effectors</b>                                       | mut-7                         | -                 | 1                   | 1.61231E-07  | 50.8          |      |
|                                                                     | cid-1                         | +                 | 2                   | 1.78E-39     | 154.8         |      |
|                                                                     | ekl-1                         | +                 | 2                   | 5.79E-14     | 71.2          |      |
|                                                                     | gfl-1                         | +                 | 1                   | 1.12E-55     | 182.2         |      |
|                                                                     | mes-2                         | +                 | 2                   | 1.05E-63     | 220.3         |      |
|                                                                     | ekl-4                         | +                 | 1                   | 1.81E-86     | 279.6         |      |
|                                                                     | mes-6                         | -                 | -                   | -            | -             |      |
|                                                                     | rha-1                         | +                 | 6                   | 2.64E-65     | 221.1         |      |
|                                                                     | ekl-6                         | -                 | -                   | -            | -             |      |
|                                                                     | zfp-1                         | -                 | -                   | -            | -             |      |
|                                                                     | mut-2                         | -                 | -                   | -            | -             |      |
|                                                                     | ekl-5                         | -                 | -                   | -            | -             |      |
|                                                                     | mes-3                         | -                 | -                   | -            | -             |      |
|                                                                     | mut-16                        | -                 | -                   | -            | -             |      |
|                                                                     | rde-2                         | -                 | -                   | -            | -             |      |
