# Supplementary material for: The Pratylenchus penetrans Transcriptome as a Source for the Development of Alternative Control Strategies: Mining for Putative Genes Involved in Parasitism and Evaluation of in planta RNAi
Source: PubMed Central journal article supplement (PMC4684371; doi:10.1371/journal.pone.0144674), 2015-12-14
Supplement: pone.0144674.s006.pdf [file pone.0144674.s006.pdf]

**S4 Table. List of other carbohydrate active enzymes identified in *Pratylenchus penetrans* transcriptome.**

| CAZy Families                 | # of transcripts | Description of CAZyme                                                        | Best hit to NR database |           |              | Top-Hit Species                |
|-------------------------------|------------------|------------------------------------------------------------------------------|-------------------------|-----------|--------------|--------------------------------|
|                               |                  |                                                                              | min. eValue             | Bit-Score | Hit ACC      |                                |
| <b>Glycoside Hydrolases</b>   |                  |                                                                              |                         |           |              |                                |
| GH2                           | 1                | Beta-mannosidase                                                             | 7.45E-150               | 479.559   | ERG82475     | <i>Ascaris suum</i>            |
| GH13                          | 1                | Alpha-amylase                                                                | 1.94E-57                | 216.468   | ERG85005     | <i>Ascaris suum</i>            |
| GH18                          | 10               | Chitinase domain-containing protein 1                                        | 1.57E-116               | 359.377   | ERG84684     | <i>Ascaris suum</i>            |
| GH20                          | 6                | Hexosaminidase d                                                             | 4.63E-145               | 450.284   | KHN80270     | <i>Toxocara canis</i>          |
| GH22                          | 1                | Destabilase family-containing protein                                        | 2.48E-58                | 195.282   | CEF60033     | <i>Strongyloides ratti</i>     |
| GH25                          | 2                | Glycoside hydrolase family 25 protein                                        | 1.42E-51                | 179.874   | XP_003290174 | <i>Dictyostelium purpureum</i> |
| GH27                          | 3                | Alpha-N-acetylgalactosaminidase                                              | 2.46E-177               | 514.998   | KHN82558     | <i>Toxocara canis</i>          |
| GH29                          | 16               | Alpha-L-fucosidase                                                           | 4.17E-78                | 535.798   | CDJ97569     | <i>Haemonchus contortus</i>    |
| GH31                          | 7                | Neutral alpha-glucosidase C                                                  | 1.89E-110               | 1156.74   | XP_003136312 | <i>Loa loa</i>                 |
| GH32                          | 3                | Beta-fructofuranosidase                                                      | 8.14E-14                | 77.7962   | WP_025417963 | <i>Rhizobium leguminosarum</i> |
| GH35                          | 4                | Beta-galactosidase                                                           | 3.20E-135               | 426.787   | KHN82876     | <i>Toxocara canis</i>          |
| GH37                          | 12               | Trehalase                                                                    | 8.12E-130               | 396.356   | AHM26075     | <i>Anisakis simplex</i>        |
| GH38                          | 10               | Glycosyl hydrolase family 38                                                 | 9.13E-149               | 441.81    | ETN75226     | <i>Necator americanus</i>      |
| GH47                          | 9                | Glycoside hydrolase domain containing protein                                | 1.67E-59                | 668.307   | CDJ83353     | <i>Haemonchus contortus</i>    |
| GH63                          | 4                | Mannosyl oligosaccharide glucosidase                                         | 1.94E-179               | 608.216   | KHN75496     | <i>Toxocara canis</i>          |
| GH84                          | 2                | Bifunctional protein ncoat                                                   | 7.35E-24                | 645.195   | ERG84657     | <i>Ascaris suum</i>            |
| GH85                          | 1                | Cytosolic endo-beta-n-acetylglucosaminidase                                  | 4.24E-68                | 236.113   | XP_005597935 | <i>Equus caballus</i>          |
| <b>Glycosyl transferases</b>  |                  |                                                                              |                         |           |              |                                |
| GT1                           | 34               | Udp-glucosyltransferase domain containing protein                            | 5.26E-131               | 407.912   | EYC40969     | <i>Ancylostoma ceylanicum</i>  |
| GT2                           | 6                | Beta-mannosyltransferase bre-3                                               | 1.76E-174               | 673.315   | ERG82825     | <i>Ascaris suum</i>            |
| GT3                           | 1                | Glycogen synthase                                                            | 0                       | 1023.85   | AAK28335     | <i>Steinernema feltiae</i>     |
| GT4                           | 9                | Alpha-1,3-mannosyltransferase ALG2                                           | 3.91E-71                | 231.106   | KHN76171     | <i>Toxocara canis</i>          |
| GT7                           | 12               | Beta-1,4-N-acetylgalactosaminyltransferase bre-4                             | 9.57E-137               | 409.068   | KHN84857     | <i>Toxocara canis</i>          |
| GT8                           | 10               | Glycosyltransferase, family 8                                                | 7.67E-88                | 276.944   | ETN68298     | <i>Necator americanus</i>      |
| GT10                          | 3                | Alpha-(1,3)-fucosyltransferase C                                             | 1.02E-78                | 267.7     | KHN84318     | <i>Toxocara canis</i>          |
| GT13                          | 4                | Alpha-1,3-mannosyl-glycoprotein 2-beta-N-acetylglucosaminyltransferase       | 1.16E-100               | 333.183   | ERG81347     | <i>Ascaris suum</i>            |
| GT14                          | 7                | N-acetyllactosaminide β-1,6-N-acetylglucosaminyltransferase                  | 2.25E-65                | 228.409   | KHN76362     | <i>Toxocara canis</i>          |
| GT16                          | 1                | Alpha-1,6-mannosyl-glycoprotein 2-beta-N-acetylglucosaminyltransferase       | 8.78E-136               | 421.394   | ERG82002     | <i>Ascaris suum</i>            |
| GT20                          | 4                | Trehalose-phosphatase                                                        | 1.48E-168               | 504.597   | KHN76157     | <i>Toxocara canis</i>          |
| GT21                          | 1                | Ceramide glucosyltransferase                                                 | 6.66E-153               | 458.373   | ERG80717     | <i>Ascaris suum</i>            |
| GT22                          | 3                | GPI mannosyltransferase 3, partial                                           | 5.01E-25                | 111.694   | ETN75500     | <i>Necator americanus</i>      |
| GT23                          | 5                | Alpha 1,6 fucosyltransferase                                                 | 2.80E-92                | 301.212   | CAI59573     | <i>Caenorhabditis briggsae</i> |
| GT24                          | 9                | Udp-glucose:glycoprotein glucosyltransferase                                 | 9.30E-138               | 420.239   | EYC35440     | <i>Ancylostoma ceylanicum</i>  |
| GT25                          | 5                | Glycosyltransferase 25 family member                                         | 1.38E-107               | 338.576   | CEF67199     | <i>Strongyloides ratti</i>     |
| GT27                          | 14               | polypeptide n-acetylgalactosaminyltransferase 3                              | 8.30E-160               | 725.317   | XP_003103194 | <i>Caenorhabditis remanei</i>  |
| GT31                          | 15               | Glycoprotein-n-acetylgalactosamine 3-beta-galactosyltransferase 1            | 3.11E-172               | 509.22    | ERG84766     | <i>Ascaris suum</i>            |
| GT33                          | 1                | Chitobiosyldiphosphodolichol beta-mannosyltransferase                        | 7.18E-92                | 297.745   | CEF64730     | <i>Strongyloides ratti</i>     |
| GT35                          | 1                | Glycogen phosphorylase                                                       | 1.87E-46                | 1434.85   | ERG79023     | <i>Ascaris suum</i>            |
| GT41                          | 3                | UDP-N-acetylglucosamine-peptide n-acetylglucosaminyltransferase              | 1.87E-86                | 1740.32   | CDP93442     | <i>Brugia malayi</i>           |
| GT43                          | 4                | Gactosylgalactosylxylosylprotein 3-beta-glucuronosyltransferase              | 2.96E-94                | 296.59    | KHN87042     | <i>Toxocara canis</i>          |
| GT47                          | 7                | Exostosin domain containing protein                                          | 4.08E-99                | 311.997   | EYB98185     | <i>Ancylostoma ceylanicum</i>  |
| GT50                          | 2                | GPI mannosyltransferase 1                                                    | 8.96E-38                | 143.665   | CEF64229     | <i>Strongyloides ratti</i>     |
| GT54                          | 1                | alpha- -mannosyl-glycoprotein 4-beta-n-acetylglucosaminyltransferase partial | 3.05E-48                | 182.956   | KHN88735     | <i>Toxocara canis</i>          |
| GT58                          | 4                | Dolichyl-P-Man:Man(5)GlcNAc(2)-PP-dolichyl mannosyltransferase               | 3.29E-82                | 267.7     | KHN72231     | <i>Toxocara canis</i>          |
| GT65                          | 3                | Gdp-fucose protein o-fucosyltransferase 1                                    | 4.77E-53                | 185.267   | ERG79773     | <i>Ascaris suum</i>            |
| GT66                          | 2                | Dolichyl-diphosphooligosaccharide-protein glycosyltransferase subunit STT3A  | 2.05E-38                | 805.438   | KHN82263     | <i>Toxocara canis</i>          |
| GT68                          | 2                | GDP-fucose protein O-fucosyltransferase 2                                    | 9.59E-125               | 392.504   | XP_003138384 | <i>Loa loa</i>                 |
| GT76                          | 2                | Dolichyl-phosphate-mannose-protein mannosyltransferase                       | 1.26E-38                | 149.443   | XP_003150671 | <i>Loa loa</i>                 |
| <b>Carbohydrate Esterases</b> |                  |                                                                              |                         |           |              |                                |
| CE1                           | 1                | S-formylglutathione hydrolase                                                | 3.65E-96                | 298.901   | XP_008555559 | <i>Microplitis demolitor</i>   |
| CE9                           | 1                | n-acetylglucosamine-6-phosphate deacetylase                                  | 6.98E-18                | 202.216   | CAA77585     | <i>C. elegans</i>              |
