# Supplementary material for: The Pratylenchus penetrans Transcriptome as a Source for the Development of Alternative Control Strategies: Mining for Putative Genes Involved in Parasitism and Evaluation of in planta RNAi
Source: PubMed Central journal article supplement (PMC4684371; doi:10.1371/journal.pone.0144674), 2015-12-14
Supplement: pone.0144674.s007.pdf [file pone.0144674.s007.pdf]

**S5 Table. Significant Blast search results against putative esophageal gland cell secretory proteins of *Meloidogyne incognita* (root-knot nematode) and *Heterodera glycines* (soybean cyst nematode).**

| <i>P. penetrans</i> transcript | Database          | Species                      | Sequence description                                                                                         | E-Value   | Bit-Score |
|--------------------------------|-------------------|------------------------------|--------------------------------------------------------------------------------------------------------------|-----------|-----------|
| Ppen13381_c0_seq1              | NEMBASE4          | <i>Meloidogyne incognita</i> | 141302mac02398_1_cluster:_<br>_esophageal_gland_cell_secretory_protein_2                                     | 2.29E-25  | 68.8822   |
| Ppen15233_c0_seq1              | NEMBASE4          | <i>Meloidogyne incognita</i> | 127298hgc00447_1_cluster:_<br>_esophageal_gland_cell_secretory_protein_26                                    | 9.26E-146 | 166.939   |
| Ppen8995_c0_seq1               | NEMBASE4          | <i>Heterodera glycines</i>   | 135206hgc11230_1_cluster:heterodera_glycines rep: gland protein<br>g20e03                                    | 1.21E-43  | 143.112   |
| Ppen16443_c0_seq2              | NEMBASE4          | <i>Heterodera glycines</i>   | 162213mjc04515_1_cluster:heterodera_glycines rep: gland protein<br>g12h04                                    | 2.89E-30  | 132.06    |
| Ppen11950_c0_seq1              | NEMBASE4          | <i>Heterodera glycines</i>   | 179923pec00345_1_cluster:heterodera_glycines rep: gland-specific<br>protein g4e02                            | 1.28E-40  | 79.421    |
| Ppen12434_c0_seq2              | NEMBASE4          | <i>Heterodera glycines</i>   | 128630hgc01884_1_cluster:heterodera_glycines rep: esophageal<br>gland cell secretory protein 6 precursor     | 2.99E-76  | 282.407   |
| Ppen12809_c0_seq1              | NEMBASE4          | <i>Heterodera glycines</i>   | 180010pec00483_1_cluster:heterodera_glycines rep: hypothetical<br>esophageal gland cell secretory protein 12 | 1.38E-121 | 246.667   |
| Ppen12536_c0_seq1              | EST Nematode_NCBI | <i>Heterodera glycines</i>   | ck349977hggfha20f07 gland cell Id pcr cdna library heterodera glycines<br>mrna sequence                      | 5.04E-07  | 54.2195   |
| Ppen11847_c0_seq1              | EST Nematode_NCBI | <i>Heterodera glycines</i>   | ck350205hggfha22h09 gland cell Id pcr cdna library heterodera<br>glycines mrna sequence                      | 3.19E-38  | 110.359   |
| Ppen11484_c0_seq1              | EST Nematode_NCBI | <i>Heterodera glycines</i>   | ck349337hggfha11h06 gland cell Id pcr cdna library heterodera<br>glycines mrna sequence                      | 4.24E-31  | 126.616   |
| Ppen11437_c0_seq1              | EST Nematode_NCBI | <i>Heterodera glycines</i>   | ck351745hggfha42g02 gland cell Id pcr cdna library heterodera<br>glycines mrna sequence                      | 3.61E-21  | 86.7523   |
| Ppen54428_c0_seq1              | EST Nematode_NCBI | <i>Heterodera glycines</i>   | ck349774hggfha17f12 gland cell Id pcr cdna library heterodera glycines<br>mrna sequence                      | 7.43E-12  | 71.1732   |
