# Supplementary material for: The Pratylenchus penetrans Transcriptome as a Source for the Development of Alternative Control Strategies: Mining for Putative Genes Involved in Parasitism and Evaluation of in planta RNAi
Source: PubMed Central journal article supplement (PMC4684371; doi:10.1371/journal.pone.0144674), 2015-12-14
Supplement: pone.0144674.s008.pdf [file pone.0144674.s008.pdf]

**S6 Table. The top best hits of the Blastp search against non-redundant protein database at the NCBI using *P. penetrans* chorismate mutase type 2 domain sequence as query.**

| Accession    | Description                         | Species                        | E-value  | Query cover | Identi. |
|--------------|-------------------------------------|--------------------------------|----------|-------------|---------|
| CAD29887     | Putative chorismate mutase          | <i>Globodera pallida</i>       | 7.00E-06 | 97%         | 48%     |
| ABR19887     | Chorismate mutase precursor protein | <i>Globodera rostochiensis</i> | 1.00E-05 | 100%        | 45%     |
| AEA07499     | Chorismate mutase precursor protein | <i>Globodera pallida</i>       | 2.00E-05 | 100%        | 45%     |
| AEA07500     | Chorismate mutase precursor protein | <i>Globodera pallida</i>       | 2.00E-05 | 100%        | 45%     |
| AIE45298     | Chorismate mutase precursor         | <i>Globodera ellingtonae</i>   | 1.00E-04 | 100%        | 44%     |
| WP_013207545 | Chorismate mutase                   | <i>Ralstonia solanacearum</i>  | 3.00E-04 | 98%         | 44%     |
