# Supplementary material for: The Pratylenchus penetrans Transcriptome as a Source for the Development of Alternative Control Strategies: Mining for Putative Genes Involved in Parasitism and Evaluation of in planta RNAi
Source: PubMed Central journal article supplement (PMC4684371; doi:10.1371/journal.pone.0144674), 2015-12-14
Supplement: pone.0144674.s009.pdf [file pone.0144674.s009.pdf]

**S7 Table. Summary of transcripts encoding proteases with a putative signal peptide and no TMHMM found in *Pratylenchus penetrans* transcriptome.**

| Peptidase class | Peptidase family | # of transcripts  | Best hit Annotation                  | Best E-value          | Best hit Species               | Acession |
|-----------------|------------------|-------------------|--------------------------------------|-----------------------|--------------------------------|----------|
| <b>Aspartic</b> | A01A             | 4                 | ASP-4                                | 0                     | <i>Meloidogyne incognita</i>   | ABC88426 |
| <b>Cysteine</b> | C01A             | 15                | Cathepsin I-like cysteine proteinase | 1.66E-155             | <i>Heterodera glycines</i>     | CAA70693 |
|                 | C13              | 2                 | Prptidase C13                        | 1.04E-149             | <i>Toxocara canis</i>          | KHN76941 |
|                 | C19              | 1                 | Protein djn                          | 1.28E-163             | <i>Ascaris suum</i>            | ERG81404 |
|                 | C48              | 3                 | Sentrin                              | 1.28E-65              | <i>Loa loa</i>                 | EJD74295 |
|                 | C95              | 2                 | Phospholipase b-like 2               | 0                     | <i>Caenorhabditis brenneri</i> | EGT40540 |
| <b>Metallo</b>  | M10A             | 4                 | Matrix metalloproteinase             | 1.12E-82              | <i>Globodera rostochiensis</i> | AAR11447 |
|                 | M12A             | 6                 | Protein NAS-isoform b                | 4.41E-144             | <i>Strongiloides ratti</i>     | CEF59451 |
|                 | M13A             | 4                 | Protein NEP                          | 8.01E-160             | <i>Haemonchus contortus</i>    | CDJ56930 |
|                 | M14B             | 1                 | Carboxypeptidase e                   | 0                     | <i>Toxocara canis</i>          | KHN75110 |
|                 | M38              | 1                 | Probable imidazolonepropionase       | 4.3E-27               | <i>Caenorhabditis brenneri</i> | EGT51018 |
| <b>Serine</b>   | S01A             | 44                | Serine protease                      | 2.64E-75              | <i>Heterodera glycines</i>     | CAA74204 |
|                 | S08B             | 1                 | KPC2-type peptidase                  | 0                     | <i>Caenorhabditis elegans</i>  | EF11145  |
|                 | S09B             | 1                 | Dipeptidyl peptidase                 | 8.7E-52               | <i>Toxocara canis</i>          | KHN82489 |
|                 | S10              | 3                 | Serine carboxypeptidase              | 8.71E-83              | <i>Radopholus similis</i>      | AIC75882 |
|                 | S28              | 1                 | Peptidase s28 domain                 | 3.65E-18              | <i>Ascaris suum</i>            | ERG84535 |
| S33             | 5                | Epoxide hydrolase | 6.89E-100                            | <i>Toxocara canis</i> | KHN84330                       |          |
